# Supplementary material for: Pumpkin seed oil: unveiling its potential in controlling inflammation and pathogenicity during experimental trichinellosis
Source: PubMed Central journal article supplement (PMC11414094; doi:10.1186/s12917-024-04241-2), 2024-09-20

Supplementary file (1): Transverse section of a mice tonsil as a confirmed control of MMP-9 marker

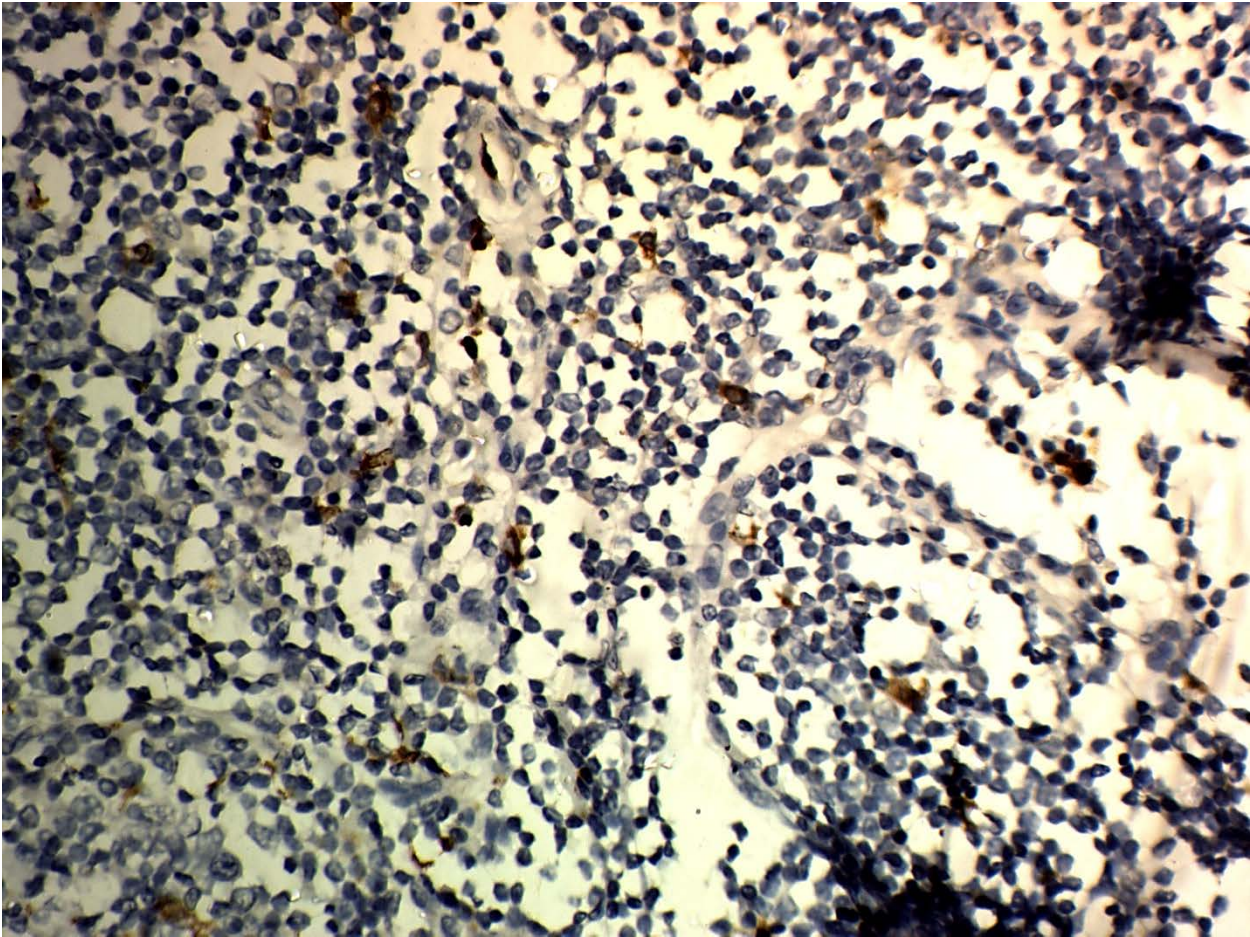

Supplement: 12917_2024_4241_MOESM1_ESM.pdf [file 12917_2024_4241_MOESM1_ESM.pdf]
